# Supplementary material for: Dual-function sensors based on carbon dots derived from corncobs for methyl nicotinate detection in solution and vapor phases
Source: Royal Society of Chemistry journal article supplement (doi:10.1039/d2nj05246f), 2022-12-01
Supplement: d2nj05246f8.pdf [file d2nj05246f8.pdf]

## Supplementary materials

### **Dual-function sensors based on carbon dots derived from corncob for methyl nicotinate detection in solution and vapor phases**

Preeyanuch Supchocksoonthorn,<sup>a</sup> Ma Concepcion Alviar Sinoy,<sup>b</sup> Sumana Kladsomboon,<sup>c</sup> Mark

Daniel G. de Luna,<sup>b</sup> Xiao Liang,<sup>d</sup> Shufeng Song,<sup>e</sup> Peerasak Paoprasert<sup>a\*</sup>

<sup>a</sup>*Department of Chemistry, Faculty of Science and Technology, Thammasat University, Pathumthani  
12120 Thailand*

<sup>b</sup>*Department of Chemical Engineering, University of the Philippines, Diliman, 1101, Quezon City,  
Philippines*

<sup>c</sup>*Department of Radiological Technology, Faculty of Medical Technology, Mahidol University,  
Bangkok, 73170 Thailand*

<sup>d</sup>*College of Chemistry and Chemical Engineering, Hunan University, Changsha, Hunan 410082, P. R.  
China*

<sup>e</sup>*College of Aerospace Engineering, Chongqing University, Chongqing 400044, China*

*\*Corresponding author, E-mail address: peerasak@tu.ac.th (Peerasak Paoprasert)*

## Materials and chemicals

All chemicals used were at least of analytical reagent grade. Quinine sulfate and hydrochloric acid (HCl) were purchased from Acros Organics.  $\text{LiNO}_3$ ,  $\text{Ca}(\text{NO}_3)_2$ ,  $\text{Li}_2\text{SO}_4$ ,  $\text{Na}_2\text{SO}_4$ , KCl,  $\text{MgCl}_2$ ,  $\text{ZnCl}_2$ , glucose, fructose, sucrose, urea, alanine, glycine, lysine, human serum (male AB plasma), artificial saliva, methyl phenylacetate, methyl *p*-anisate, *o*-phenyl anisole, MN, 4-vinylpyridine, and pyridine were bought from Merck. Acetonitrile (HPLC grade, Carlo Erba) was used as the mobile phase for HPLC. Artificial urine was purchased from Fortune Scientific Co., Ltd. A dialysis membrane (molecular weight cut-off, MWCO = 1,000 Da), was purchased from Membrane Filtration Products, Inc. Deionized (DI) water (resistivity > 18  $\text{M}\Omega\cdot\text{cm}$ ) was used in all experiments.

## Characterization of CDs

The chemical composition of the CDs was investigated using a Fourier-transform infrared (FT-IR) spectrometer (Perkin Elmer, Spectrum 2000) and an X-ray photoelectron spectrometer (XPS; AXIS ULTRA<sup>DLD</sup>, Kratos Analytical, Manchester, UK). Size and morphology were evaluated using a JEOL JEM-2100 transmission electron microscope (TEM) with an accelerating voltage of 200 kV at a magnification of 100,000X. The optical absorbance and photoluminescence emission spectra were measured using a Duetta fluorescence and absorbance spectrometer (HORIBA). The HPLC method (Shimadzu, LC-20AT series) was performed using the UV detector (268 nm) and a C18 column joined with a guard column. The validity of the results was evaluated using the *t*-test and *F*-test. A mobile phase of acetonitrile/water (1:1 v/v) was used in a 10- $\mu\text{L}$  injection loop with a flow rate of 1.0  $\text{mL}\cdot\text{min}^{-1}$ .

The quantum yields of the CDs were measured based on previous studies<sup>1, 2</sup>. Briefly, quinine sulfate in 0.1 M  $\text{H}_2\text{SO}_4$  was used as a reference. The optical absorbance and fluorescence emission areas of the CDs and quinine sulfate at different concentrations were measured (quantum yield = 54%, an excitation at 349 nm). The quantum yield of the CDs was calculated using the slope method.

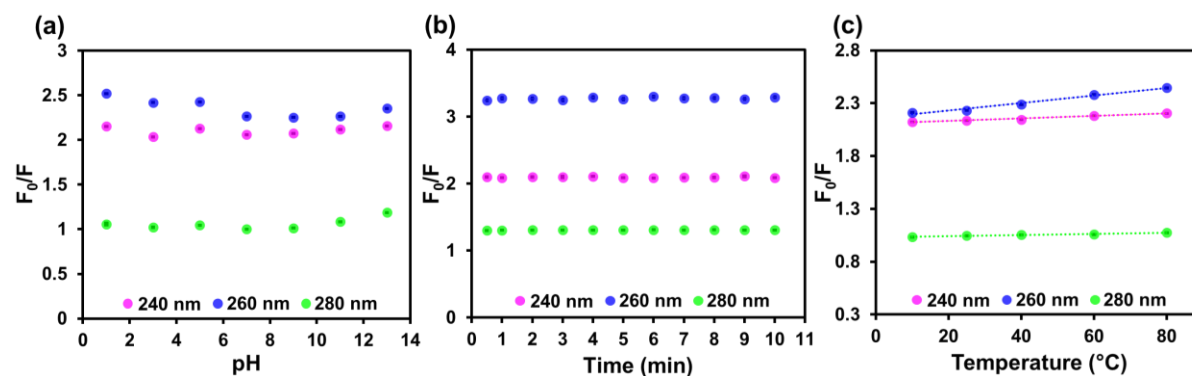

**Figure S1.** (a) Plot of ratio of fluorescence intensities versus pH, (b) mixing time, and (c) temperature.

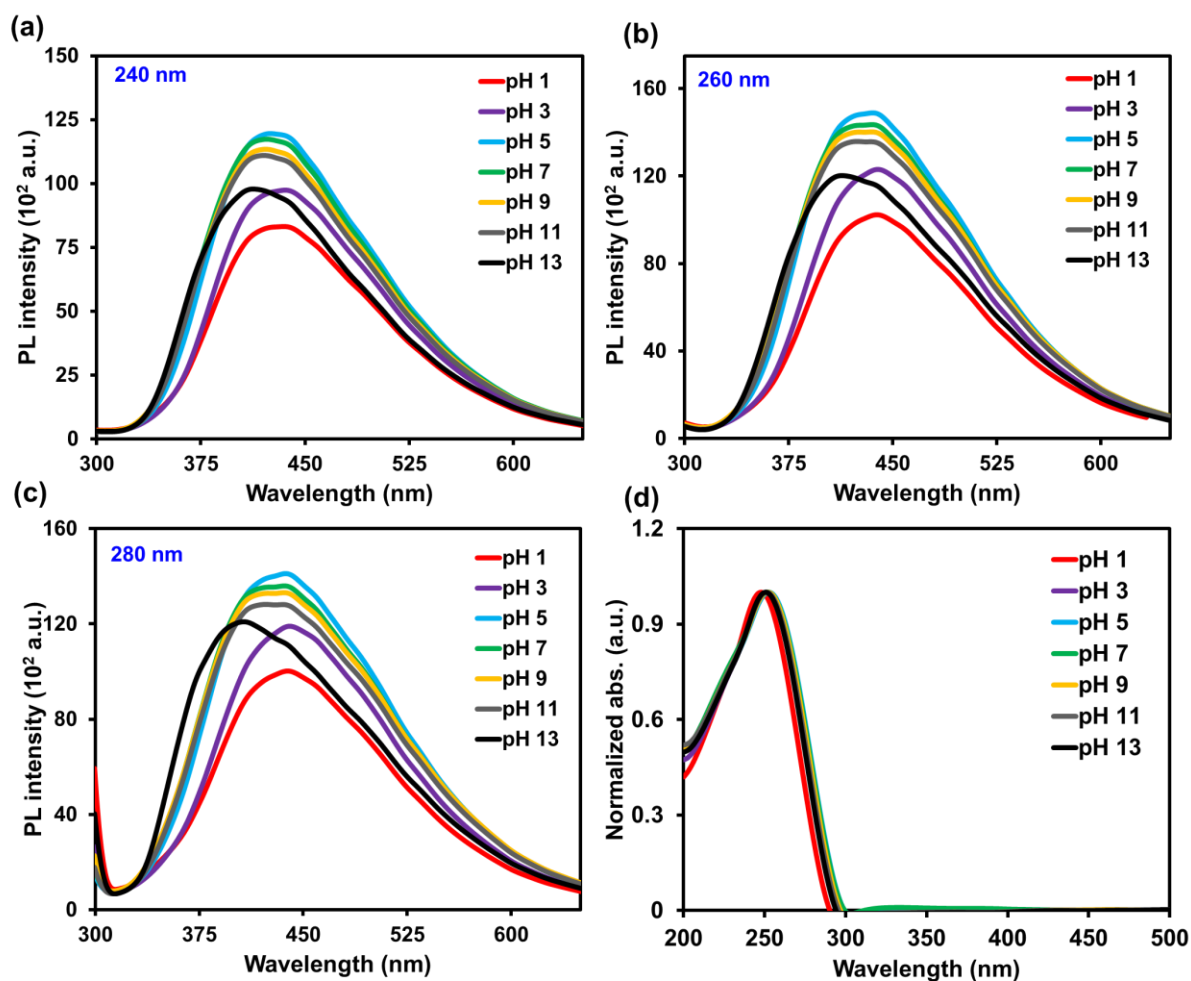

**Figure S2.** (a-c) Fluorescence emission spectra of carbon dots under different excitation wavelengths (240, 260, and 280 nm) and (d) UV-vis spectra of MN from pH 1 to 13.

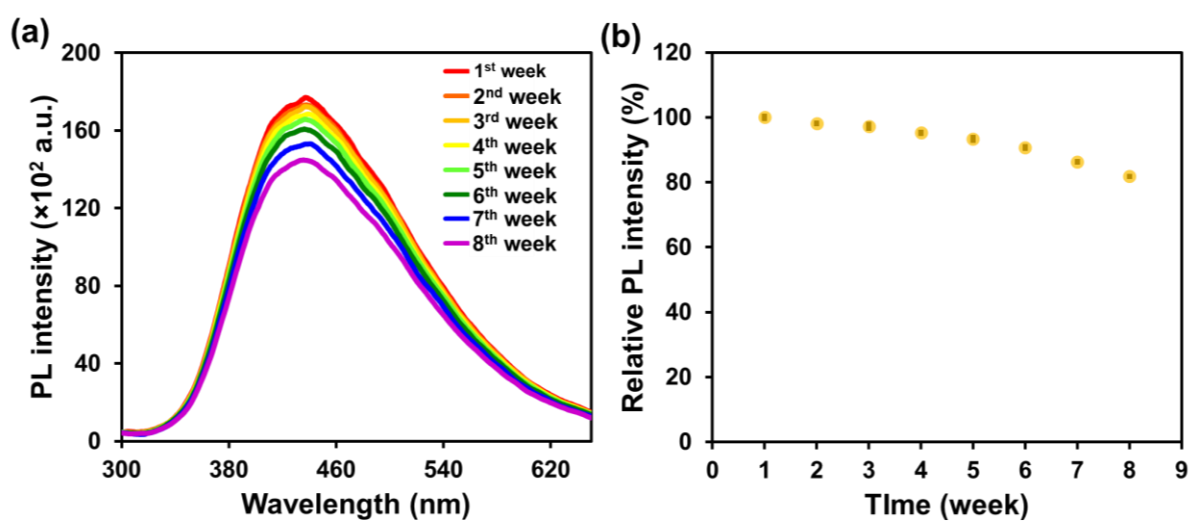

**Figure S3.** (a) Fluorescence emission spectra of carbon dots using an excitation of 260 nm at different time intervals. (b) Relative fluorescence intensity versus time.

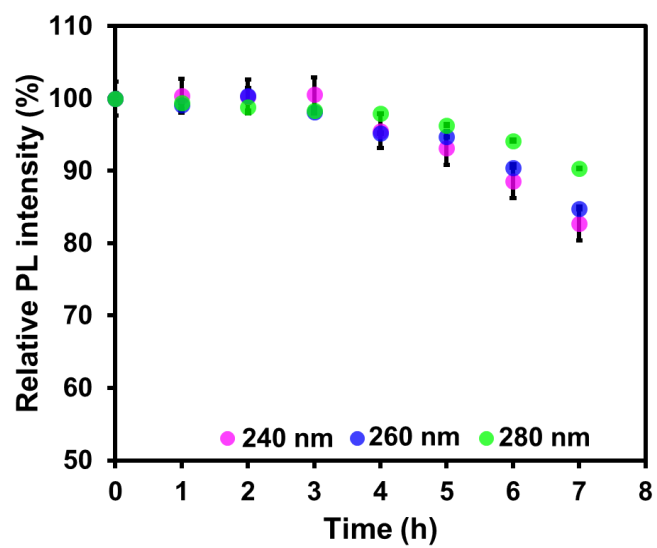

**Figure S4.** (a) Plot of fluorescence intensities measured at 432 nm and excited at 240, 260, and 280 nm under continuous 365-nm UV irradiation as a function of time.

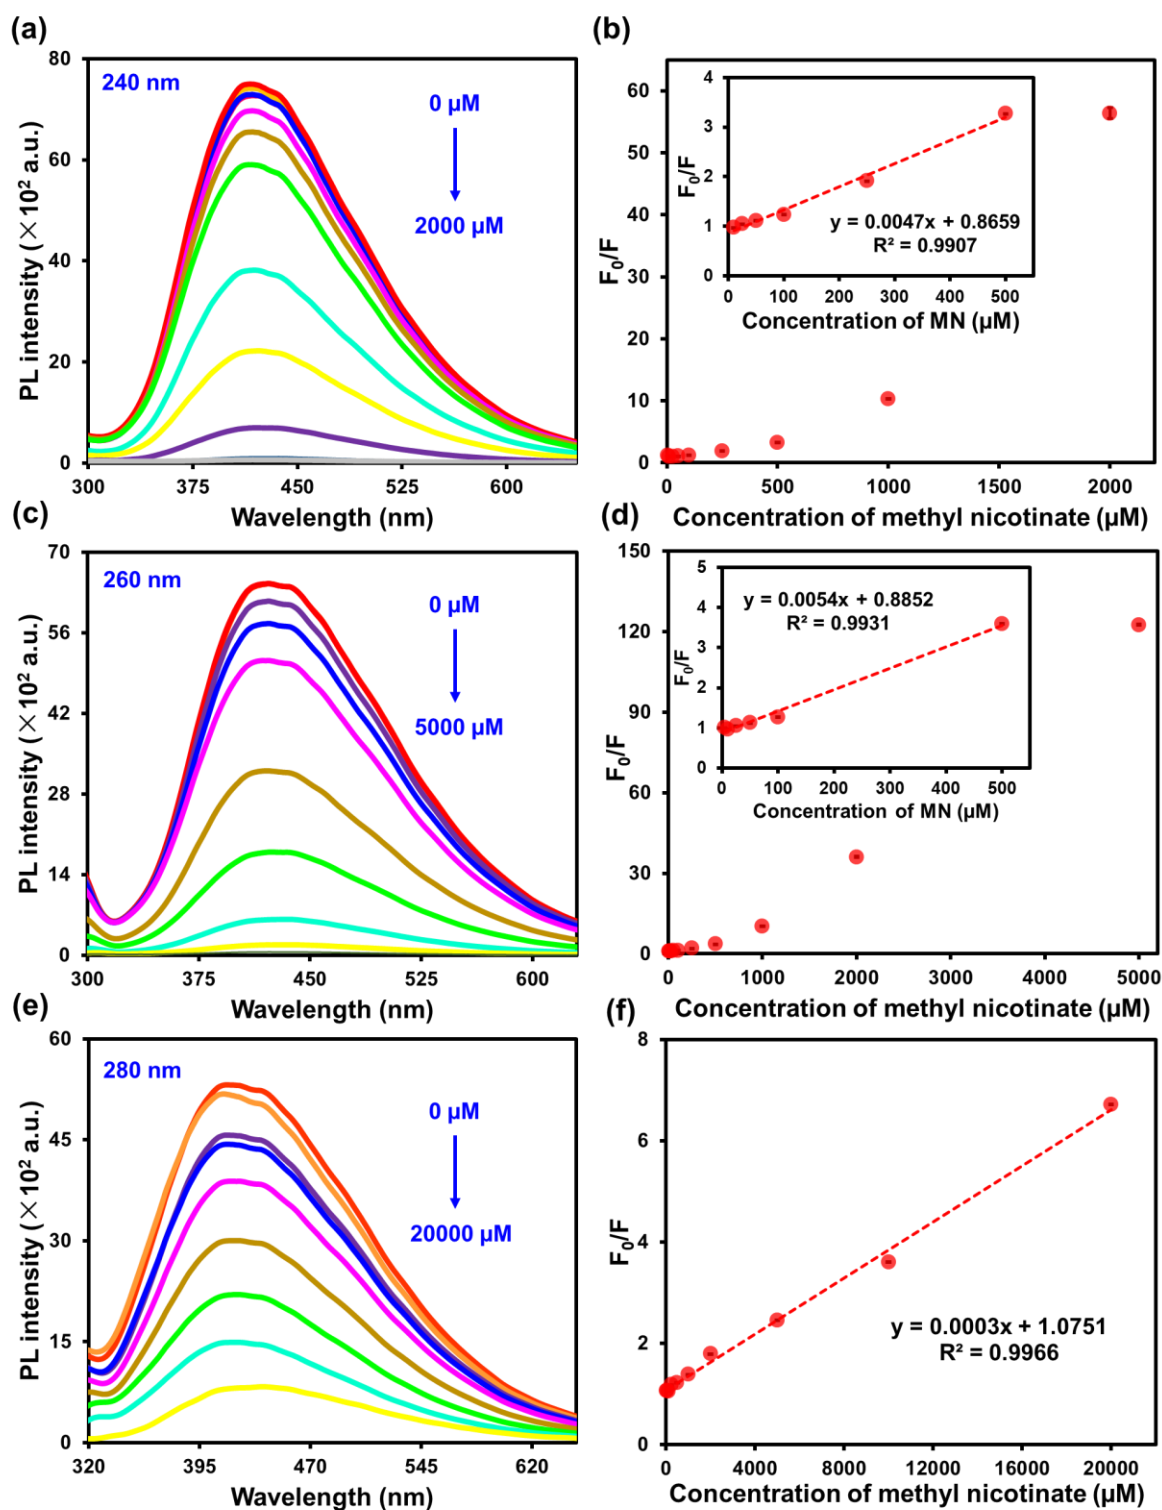

**Figure S5.** (a, c, e) Fluorescence emission spectra of carbon dots (0.01 mg·mL<sup>-1</sup>) in the presence of different concentrations of MN at pH 7 with different excitation wavelengths. (b, d, f) The plot between  $F_0/F$  and concentrations of MN; inset figure shows the linear range of the plot.

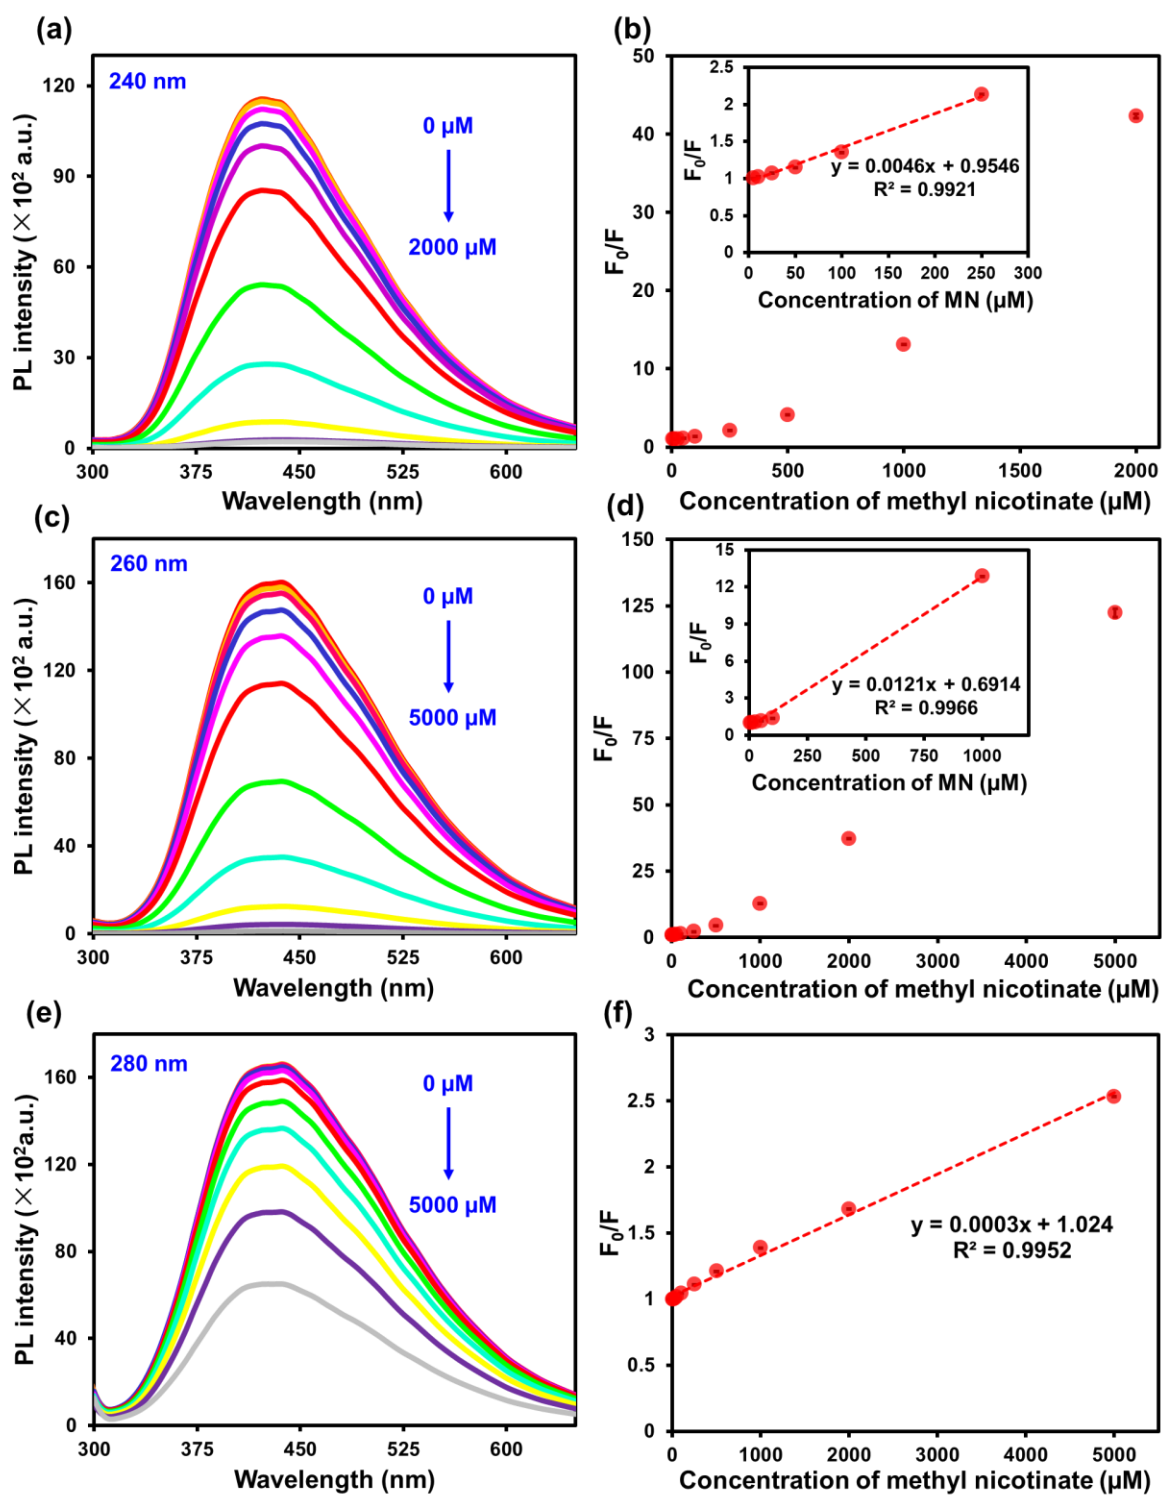

**Figure S6.** (a, c, e) Fluorescence emission spectra of carbon dots (0.10 mg·mL<sup>-1</sup>) in the presence of different concentrations of MN at pH 7 with different excitation wavelengths. (b, d, f) The plot between  $F_0/F$  and concentrations of MN; inset figure shows the linear range of the plot.

## Reference

1. M. Pacquiao, M. D. De Luna, N. Thongsai, S. Kladsomboon and P. Paoprasert, *Highly fluorescent carbon dots from enokitake mushroom as multi-faceted optical nanomaterials for Cr<sup>6+</sup> and VOC detection and imaging applications*, 2018.
2. S. Moonrinta, B. Kwon, I. In, S. Kladsomboon, W. Sajomsang and P. Paoprasert, *Opt. Mater.*, 2018, **81**, 93-101.
