# Supplementary figures and images for: Dual-function sensors based on carbon dots derived from corncobs for methyl nicotinate detection in solution and vapor phases
Source: Royal Society of Chemistry journal article supplement (doi:10.1039/d2nj05246f), 2022-12-01

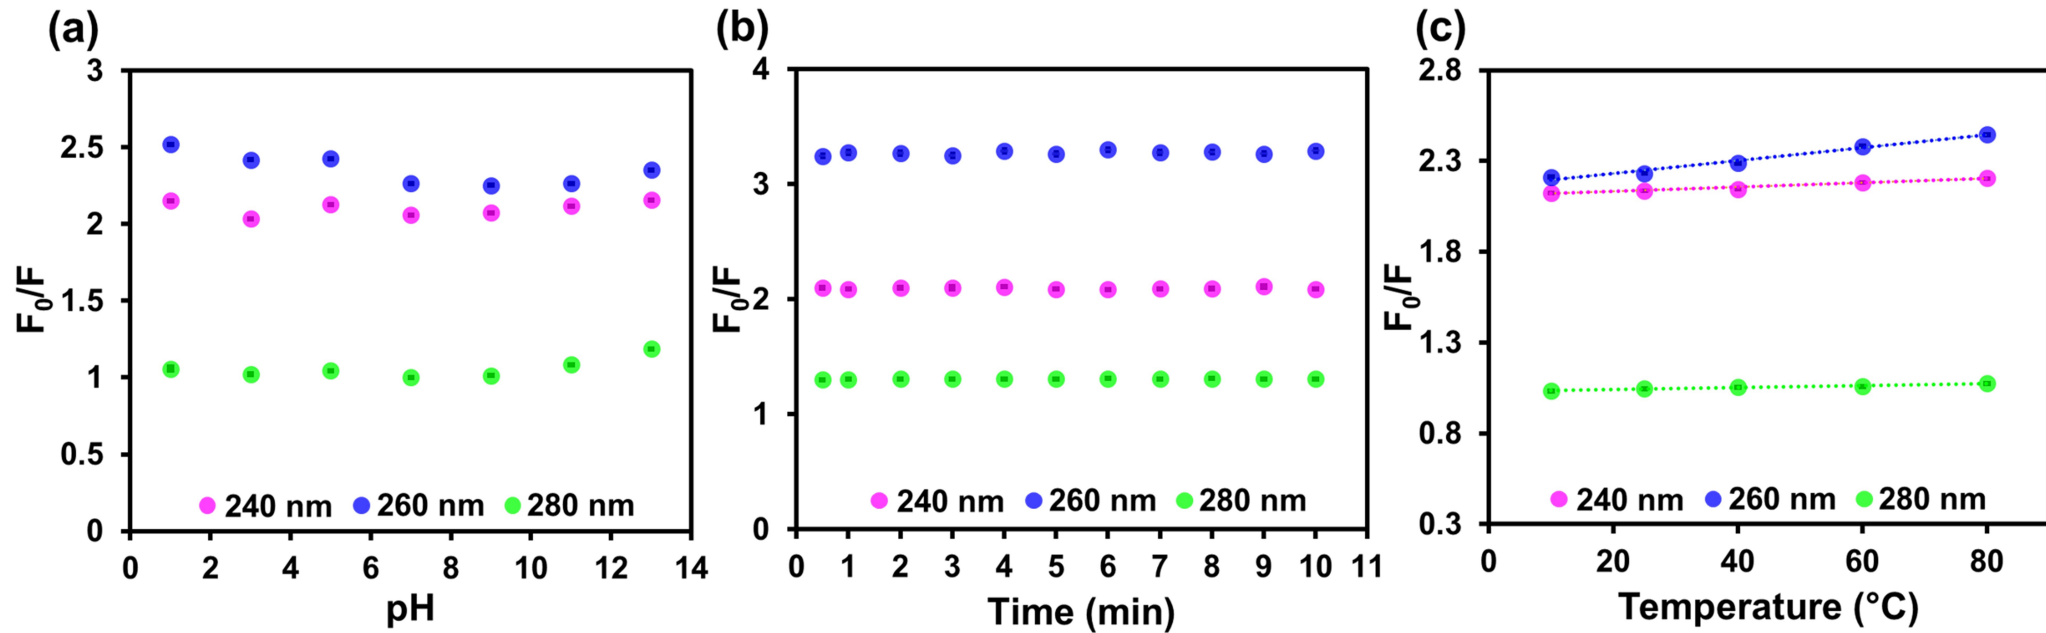

Supplement: d2nj05246f2.pdf [file d2nj05246f2.pdf]

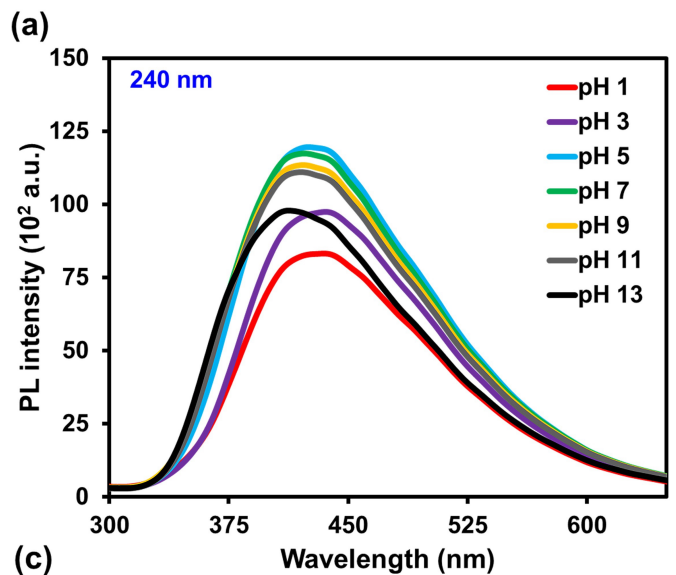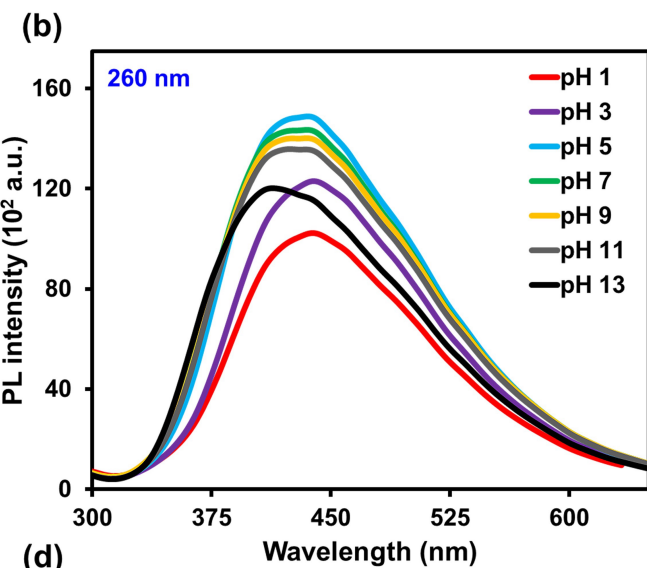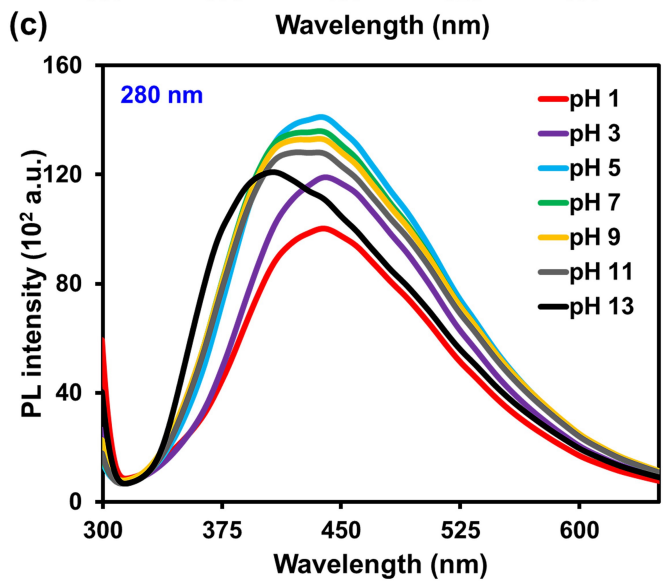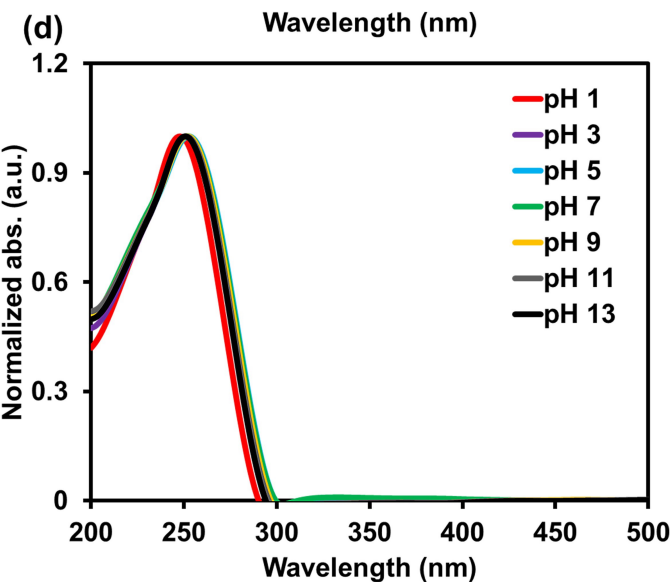

Supplement: d2nj05246f3.pdf [file d2nj05246f3.pdf]

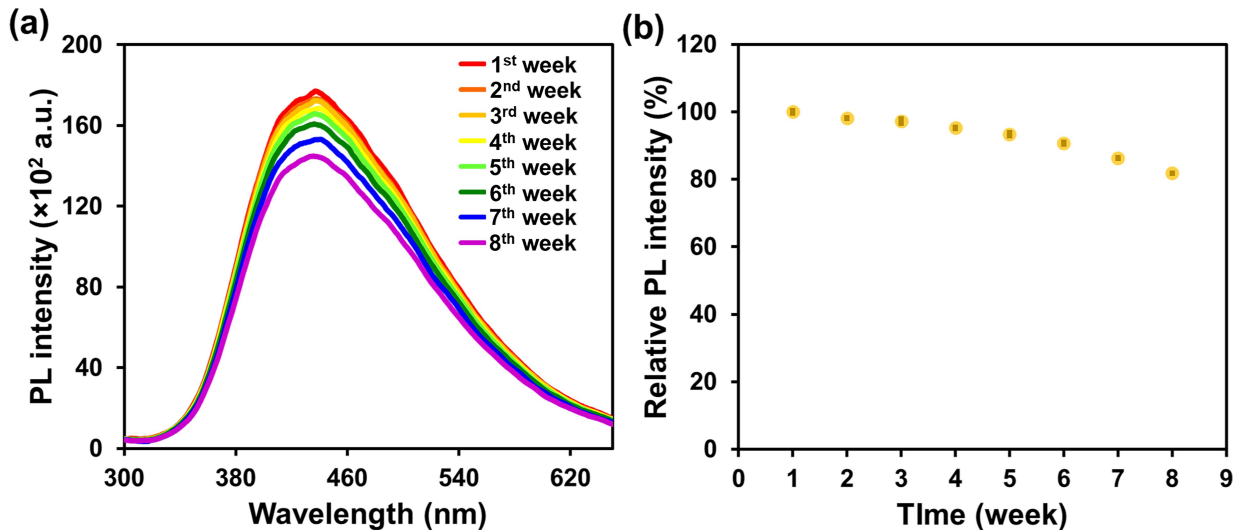

Supplement: d2nj05246f4.pdf [file d2nj05246f4.pdf]

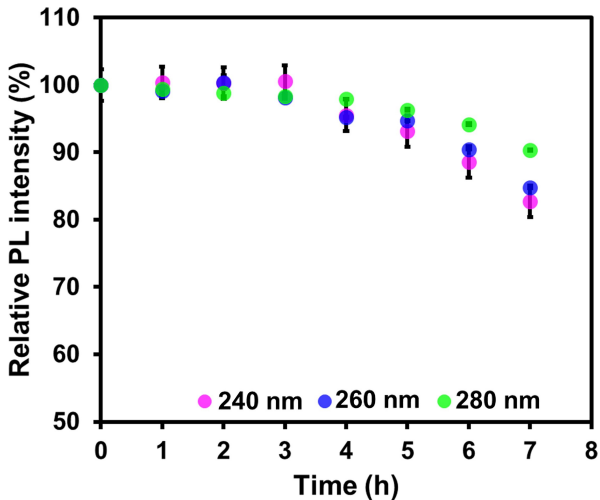

Supplement: d2nj05246f5.pdf [file d2nj05246f5.pdf]

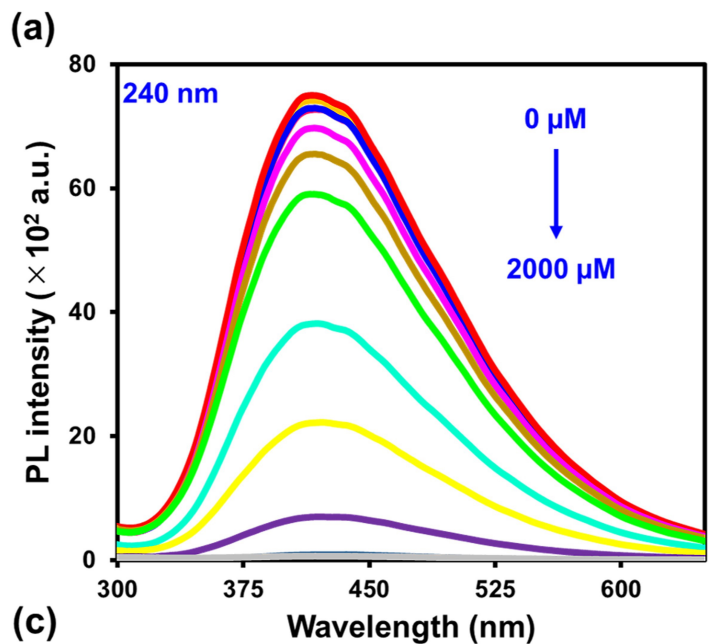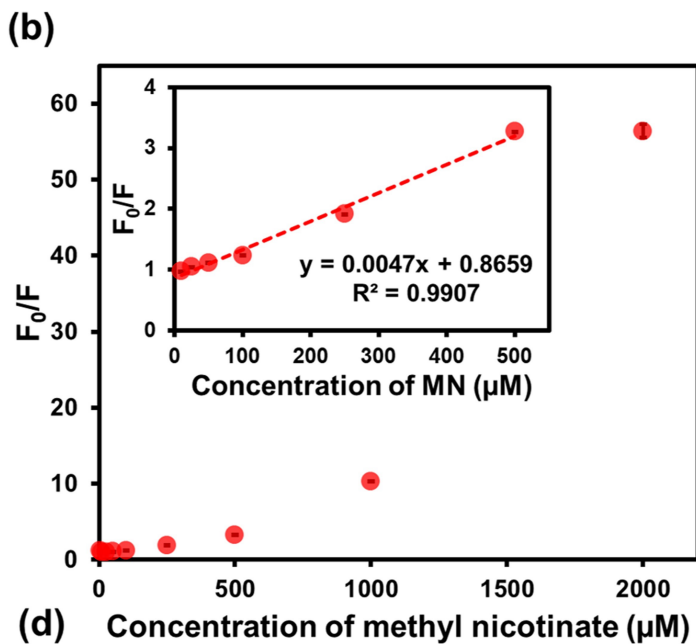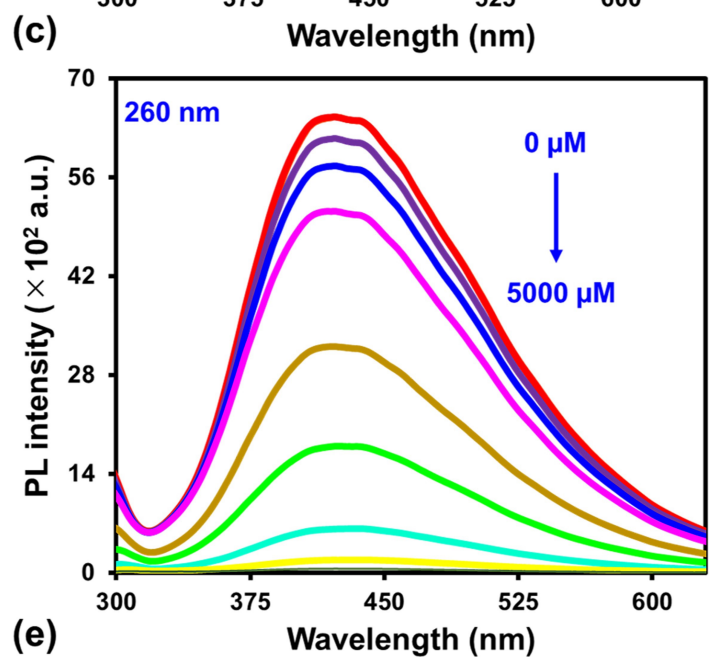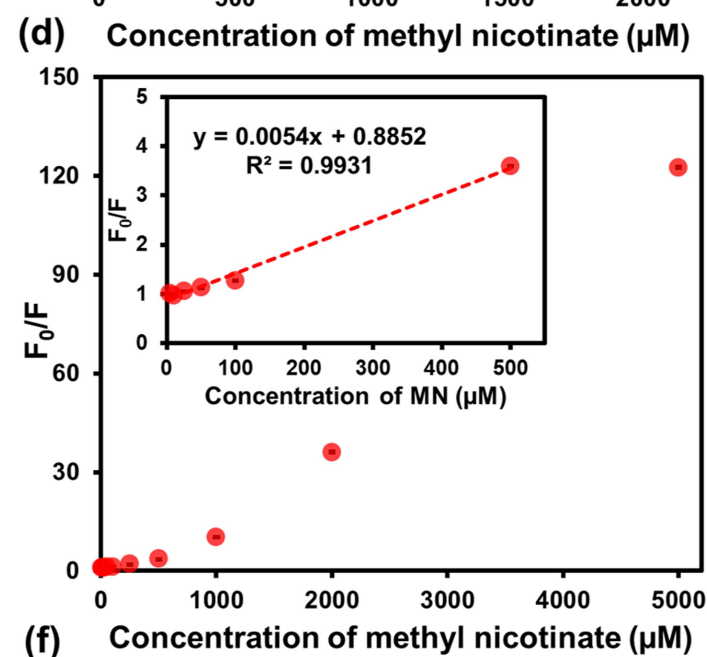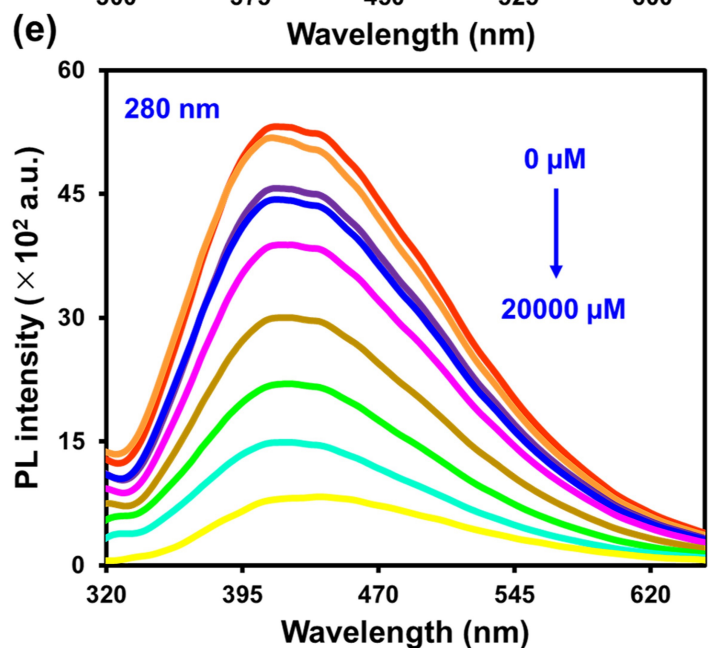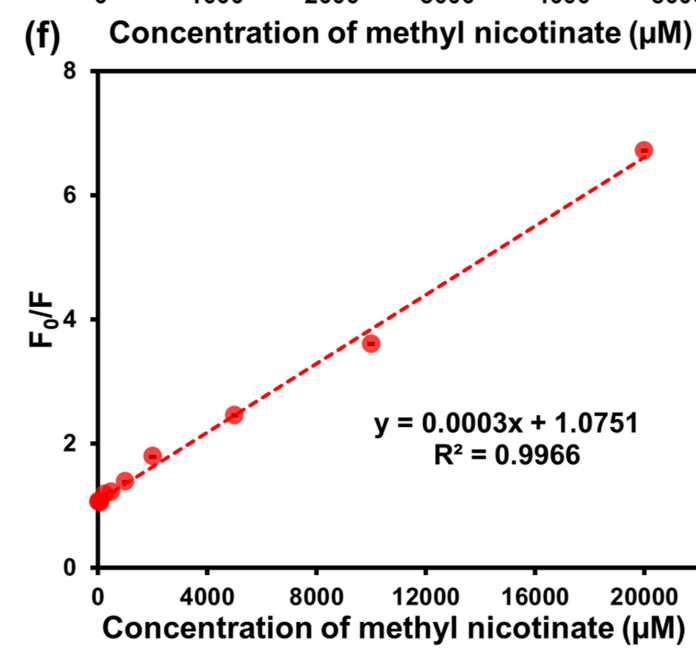

Supplement: d2nj05246f6.pdf [file d2nj05246f6.pdf]

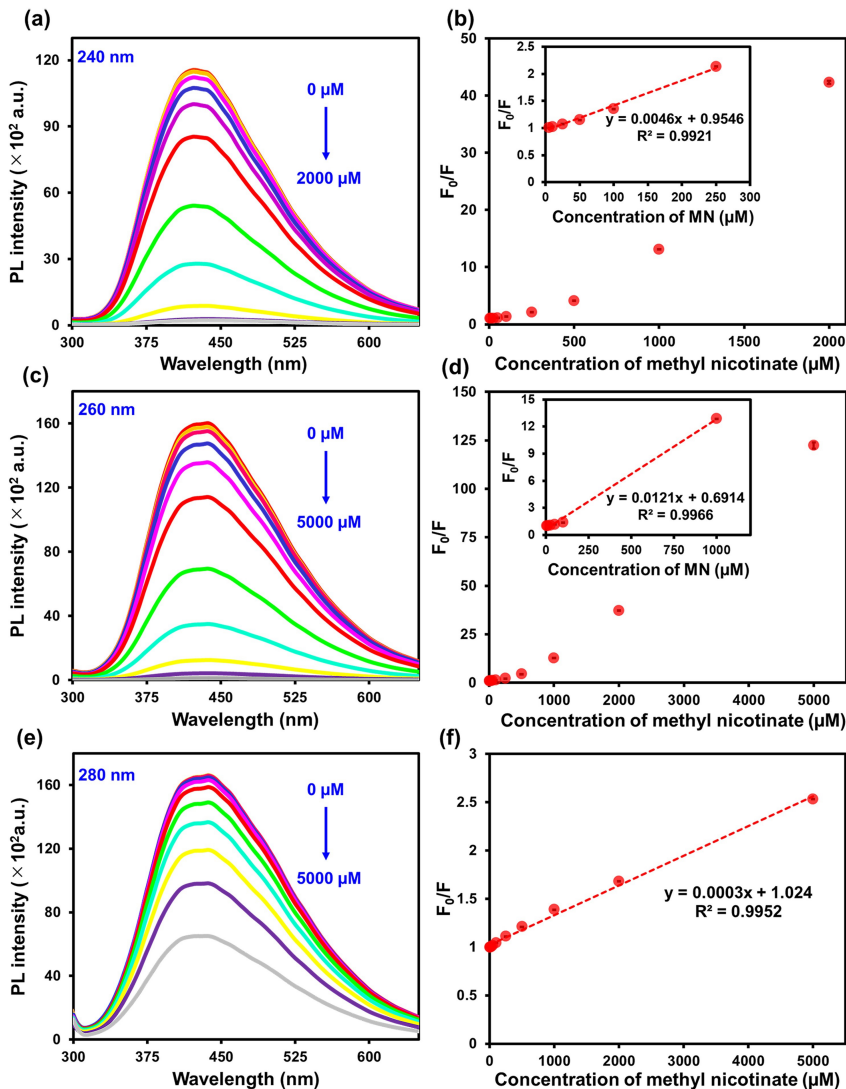

Supplement: d2nj05246f7.pdf [file d2nj05246f7.pdf]
